# Supplementary material for: A computational approach for categorizing street segments in urban street networks based on topological properties
Source: Frontiers journal article supplement (doi:10.3389/fbuil.2023.1216888), 2024-01-09
Supplement: Data_Sheet_1.pdf [file Data_Sheet_1.pdf]

Chen, H.-H., Mumm, O., & Carlow, V.M. (2023).  
A computational approach for categorizing street segments  
in urban street networks based on topological properties.  
Frontiers in Built Environment, 9. doi:10.3389/fbuil.2023.1216888

$\Sigma$ upplementary  
Material

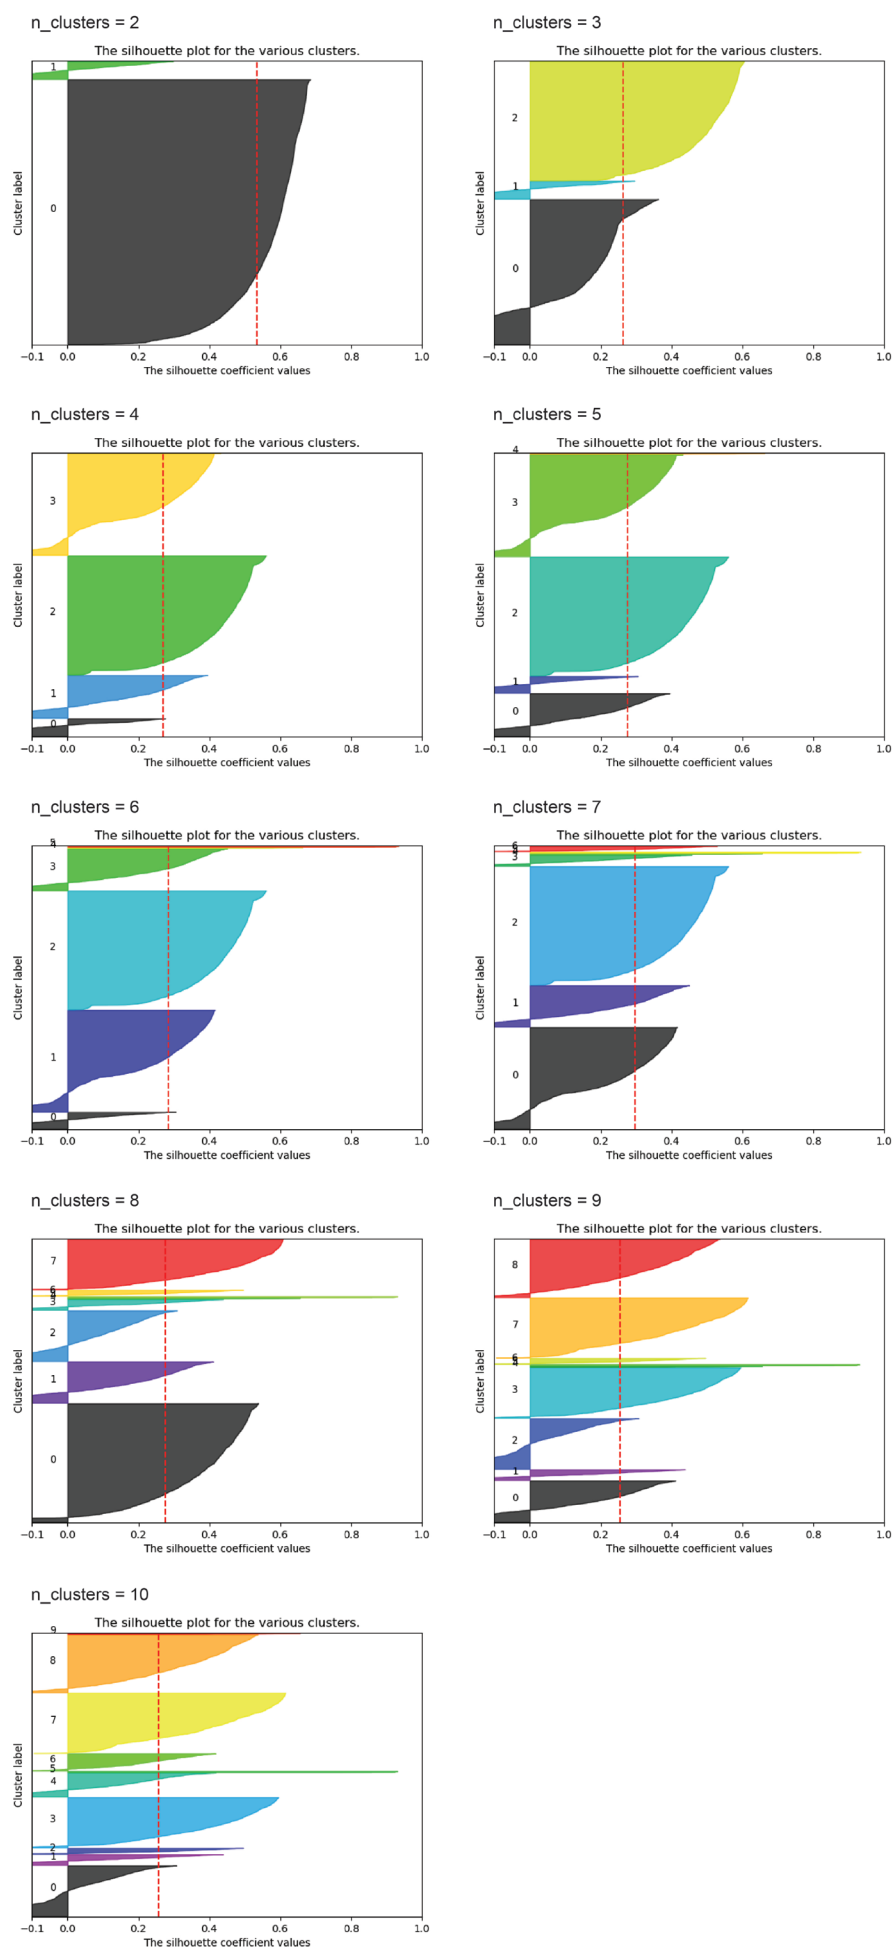

Figure S01. Silhouette analysis: HAC-ward clustering on sample data with  $n\_clusters$ .

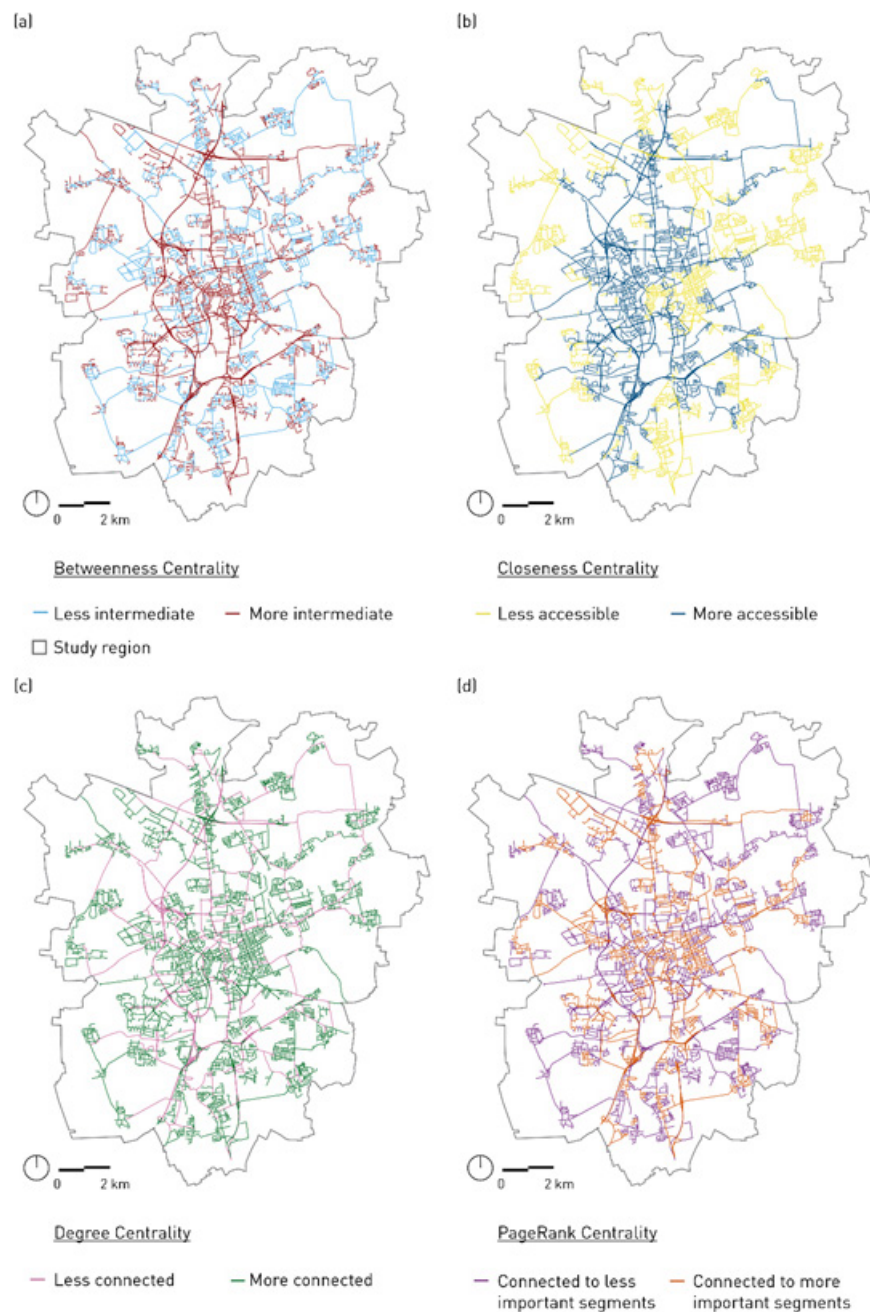

**Figure S02.** Spatial distribution of the four considered centrality measures: betweenness centrality, closeness centrality, degree centrality, PageRank centrality. Map Data: OpenStreetMap contributors, 2021.

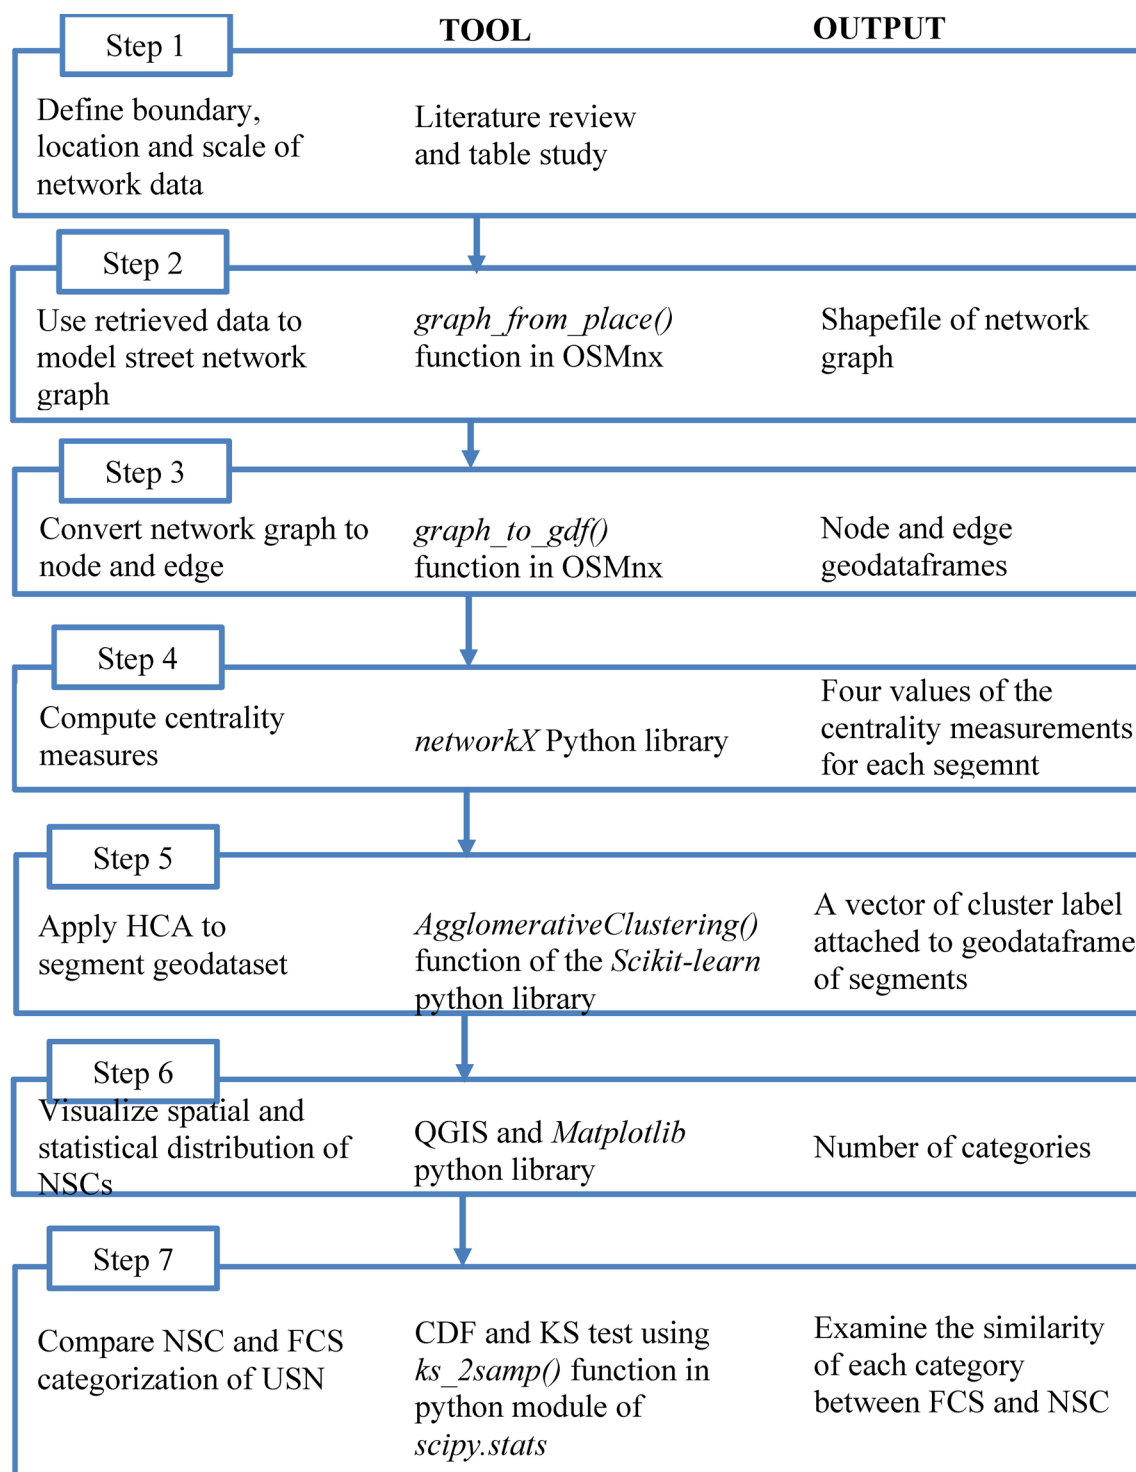

Figure S03. Flow chart: Methodology and workflow of NSC method.

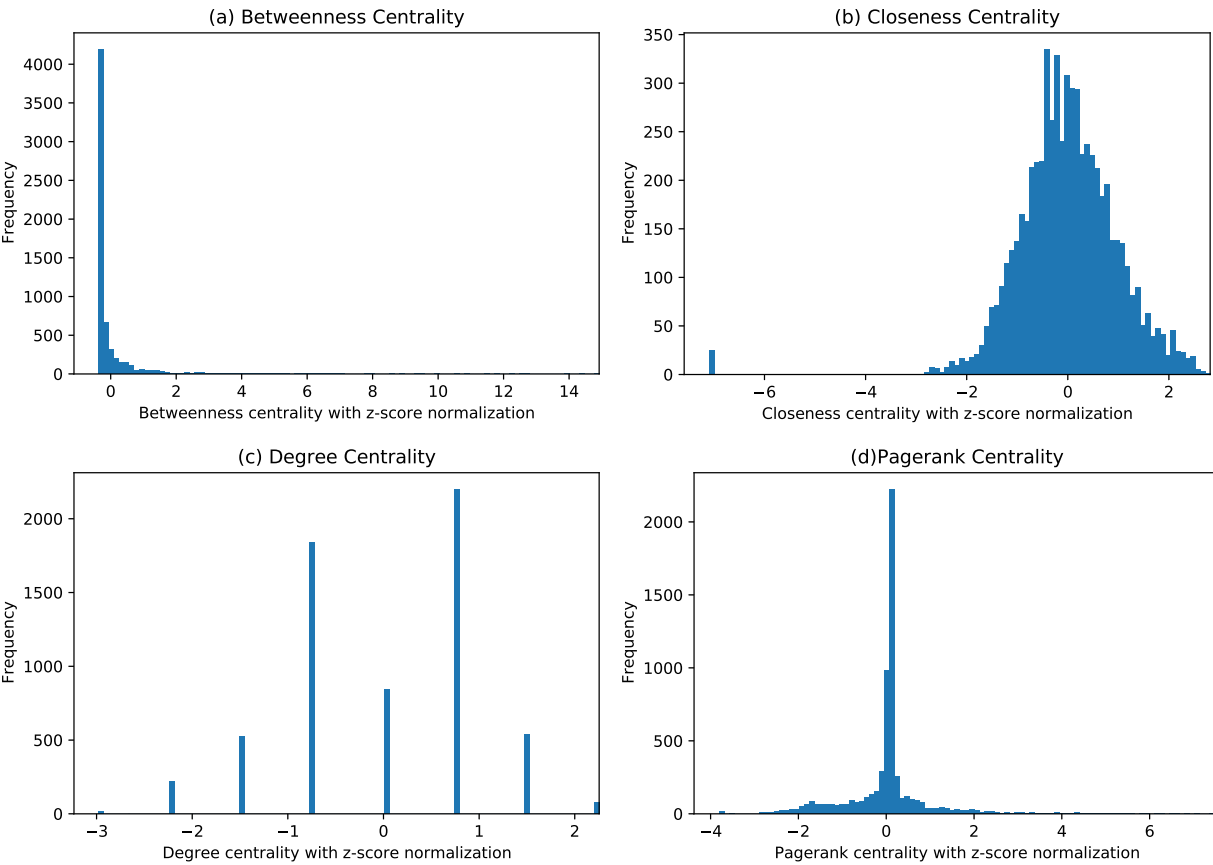

Figure S04. Frequency distribution of the four centrality measures normalized with z-score.

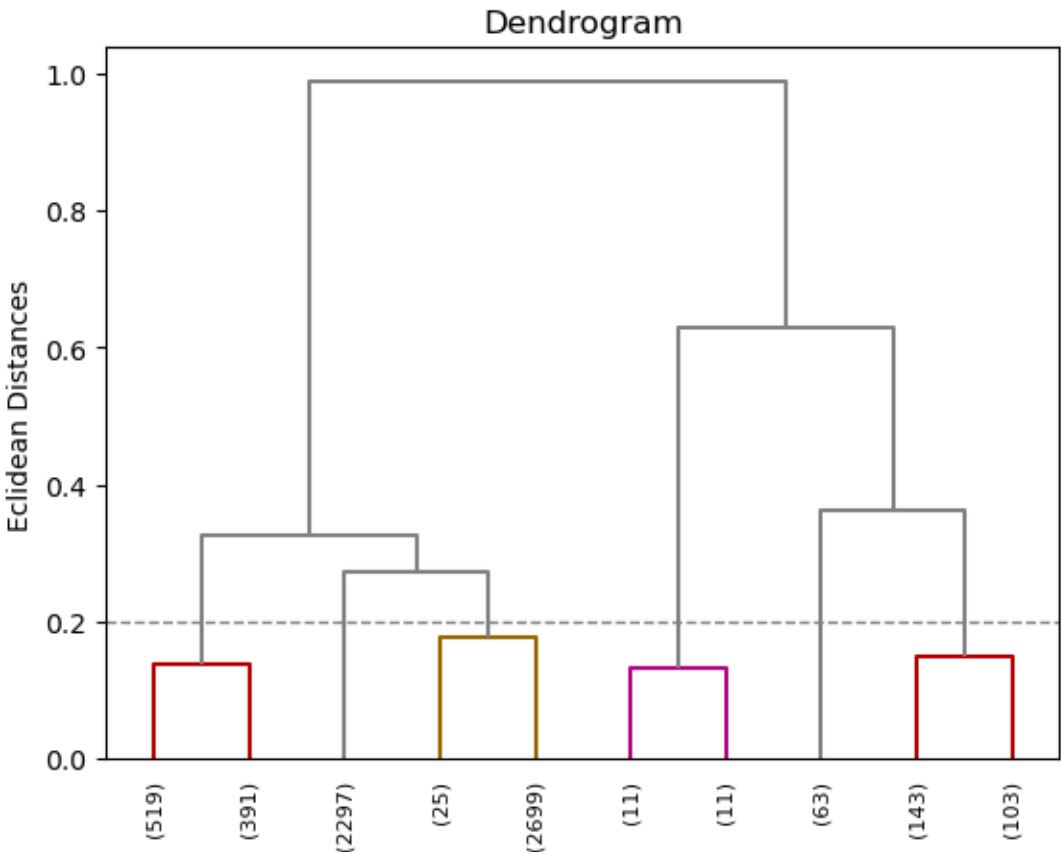

Figure S05. Dendrogram of hierarchical agglomerative clustering (HAC).

**Table S01.** OpenStreetMap (OSM): values key:highway, and number of segments of each value (class) in the study region Braunschweig.

| OSM key:highway | Definition                                                                                                                                                                                                                                                                                                                                                            | Number of segments |
|-----------------|-----------------------------------------------------------------------------------------------------------------------------------------------------------------------------------------------------------------------------------------------------------------------------------------------------------------------------------------------------------------------|--------------------|
| Motorway        | Highest-performing segments within the entire network and usually has at least two lanes in each traffic direction with some degree of separation. It is typically pedestrian and bicycle prohibited, free from intersection controls, accessed by a ramp and has no direct access to private properties.                                                             | 295                |
| Primary         | Major segments linking large towns.                                                                                                                                                                                                                                                                                                                                   | 272                |
| Secondary       | Segments which are not part of a major route, but nevertheless provide a link to the national route network.                                                                                                                                                                                                                                                          | 830                |
| Tertiary        | Segments connecting minor streets to primary and secondary roads with low to moderate traffic. In the outer sub-urban areas, used on segments connecting smaller settlements such as villages or hamlets. Within larger urban areas such as large towns or cities, tertiary segments link local centres of activity such as shopping areas, and schools with suburbs. | 754                |
| Residential     | Low-speed segments used by local traffic within settlements to provide full access to the front of properties in the residential areas.                                                                                                                                                                                                                               | 4,026              |
| Unclassified    | Unclassified segments are one of the following type of segments: less important than tertiary segments; considered usable by motor cars; not residential streets or agricultural tracks; of low importance within town and cities (if not residential)                                                                                                                | 94                 |
|                 |                                                                                                                                                                                                                                                                                                                                                                       | TOTAL: 6,262       |

**Table S02.** Share of segments for each NSC category within each FCS class.

| NSC Category | Motorway |        | Primary |        | Secondary |        | Tertiary |        | Residential |        | Unclassified |        |
|--------------|----------|--------|---------|--------|-----------|--------|----------|--------|-------------|--------|--------------|--------|
|              | Count    | [%]    | Count   | [%]    | Count     | [%]    | Count    | [%]    | Count       | [%]    | Count        | [%]    |
| 1            | 22       | 7.77   | 0       | 0.00   | 0         | 0.00   | 0        | 0.00   | 0           | 0.00   | 0            | 0.00   |
| 2            | 39       | 13.78  | 0       | 0.00   | 19        | 2.29   | 2        | 0.27   | 0           | 0.00   | 0            | 0.00   |
| 3            | 66       | 23.32  | 60      | 22.47  | 71        | 8.56   | 35       | 4.67   | 10          | 0.25   | 1            | 1.19   |
| 4            | 52       | 18.37  | 110     | 41.20  | 377       | 45.48  | 212      | 28.27  | 148         | 3.68   | 9            | 10.71  |
| 5            | 72       | 25.44  | 54      | 20.22  | 239       | 28.83  | 203      | 27.07  | 1,679       | 41.68  | 43           | 51.19  |
| 6            | 32       | 11.31  | 13      | 16.10  | 123       | 14.84  | 298      | 39.73  | 2,190       | 54.40  | 31           | 36.90  |
| Total        | 283      | 100,00 | 267     | 100,00 | 829       | 100,00 | 750      | 100,00 | 4,026       | 100,00 | 84           | 100,00 |
